# Supplementary material for: Divergence Times and Phylogenetic Patterns of Sebacinales, a Highly Diverse and Widespread Fungal Lineage
Source: PLoS One. 2016 Mar 3;11(3):e0149531. doi: 10.1371/journal.pone.0149531 (PMC4795679; doi:10.1371/journal.pone.0149531)
Supplement: S4 Table — (XLS) [file pone.0149531.s004.xls]

## Sheet: tree_annotation_full.txt
AB444647	0	orc	AS
AB444650	295	orc	AS
AB444652	1	orc	AS
AB453033	2	ECM	AS
AB636111	3	ECM	AS
AB641315	4	orc	AS
AB688992	292	orc	AS
AB769914	5	ECM	AS
AB831787	6	Achlorophyllous	AS
AB831789	7	Achlorophyllous	AS
AB831790	8	Achlorophyllous	AS
AB831791	9	Achlorophyllous	AS
AB831792	10	Achlorophyllous	AS
AB831793	397	Achlorophyllous	AS
AB831794	11	Achlorophyllous	AS
AB831795	12	Achlorophyllous	AS
AB831796	300	ECM	AS
AB831797	28	Achlorophyllous	AS
AB831798	13	Achlorophyllous	AS
AB831799	32	Achlorophyllous	AS
AB831800	33	Achlorophyllous	AS
AB831801	426	Achlorophyllous	AS
AB831802	14	Achlorophyllous	AS
AB831803	471	Achlorophyllous	AS
AB831804	15	Achlorophyllous	AS
AB831805	496	Achlorophyllous	AS
AB831806	16	Achlorophyllous	AS
AB831807	477	Achlorophyllous	AS
AB831808	268	Achlorophyllous	AS
AB831809	470	Achlorophyllous	AS
AB831810	505	Achlorophyllous	AS
AB831811	17	Achlorophyllous	AS
AB831812	18	Achlorophyllous	AS
AB831813	478	Achlorophyllous	AS
AB848591	344	ECM	AS
AB848592	521	ECM	AS
AB848593	470	ECM	AS
AB848595	524	ECM	AS
AB848597	56	ECM	AS
AB848599	326	ECM	AS
AB848600	19	ECM	AS
AB848601	20	ECM	AS
AB848602	347	ECM	AS
AB848603	21	ECM	AS
AB848604	229	ECM	AS
AB848605	22	ECM	AS
AB848606	323	ECM	AS
AB848608	23	ECM	AS
AB848610	472	ECM	AS
AB848611	356	ECM	AS
AB848613	343	ECM	AS
AB848614	436	ECM	AS
AB848616	518	ECM	AS
AB848617	435	ECM	AS
AB848618	24	ECM	AS
AB848619	499	ECM	AS
AB854701	25	ECM	AS
AB854702	508	ECM	AS
AB854703	26	ECM	AS
AB854704	397	ECM	AS
AB854705	478	ECM	AS
AB854706	27	ECM	AS
AB854707	28	ECM	AS
AB854708	29	ECM	AS
AB854709	30	ECM	AS
AB854710	31	ECM	AS
AB854712	32	ECM	AS
AB854713	33	ECM	AS
AF019636	445	Endophytic	AS
AF202728	370	Achlorophyllous	AS
AF440641	429	Achlorophyllous	EU
AF440646	430	Achlorophyllous	EU
AF440647	349	Achlorophyllous	EU
AF440649	473	Achlorophyllous	EU
AF440651	492	Achlorophyllous	EU
AF440652	511	Achlorophyllous	EU
AF440653	353	Achlorophyllous	EU
AF440655	517	Achlorophyllous	EU
AF440663	493	Achlorophyllous	EU
AF440664	472	Achlorophyllous	EU
AF509964	491	ECM	EU
AF509965	509	ECM	EU
AJ549120	60	orc	EU
AJ549198	511	ECM	EU
AJ879655	456	ECM	EU
AJ879661	321	ECM	EU
AJ893256	355	ECM	EU
AM181396	34	ericoid	EU
AM181401	35	arbutoid	EU
AM181406	416	arbutoid	EU
AY093436	36	ECM	AU
AY093437	37	ECM	AU
AY093438	446	ECM	AU
AY192164	492	ECM	NA
AY243528	356	Achlorophyllous	NA
AY243529	231	Achlorophyllous	NA
AY243530	398	Achlorophyllous	NA
AY243531	475	Achlorophyllous	NA
AY243532	38	Achlorophyllous	NA
AY243533	65	Achlorophyllous	NA
AY286193	430	orc	NA
AY296253	324	ECM	NA
AY296254	226	ECM	NA
AY296255	39	ECM	NA
AY296256	57	ECM	NA
AY296257	434	ECM	NA
AY296258	517	ECM	NA
AY452676	510	Endophytic	EU
AY452678	511	orc	EU
AY452680	398	ECM	EU
AY534208	40	ECM	NA
AY634116	41	orc	EU
AY634117	413	orc	EU
AY634118	152	orc	EU
AY634132	416	orc	EU
AY634133	353	orc	EU
AY825518	466	ECM	EU
AY825520	157	ECM	EU
AY940650	493	ECM	EU
AY940652	473	ECM	EU
DQ150132	464	orc	EU
DQ182435	42	orc	EU
DQ273402	425	ECM	NA
DQ273403	48	ECM	NA
DQ273404	43	ECM	NA
DQ273405	426	ECM	NA
DQ278945	370	orc	EU
DQ352049	167	cavendishioid	SA
DQ377407	287	ECM	NA
DQ520096	44	orc	AU
DQ520103	362	saprobic	EU
DQ974764	501	ECM	NA
DQ974765	361	ECM	NA
DQ983814	45	orc	AU
DQ983816	365	orc	AU
EF027386	263	ECM	NA
EF030880	466	arbutoid	EU
EF030882	468	ericoid	EU
EF030946	523	ericoid	EU
EF127237	46	ericoid	AS
EF218815	430	ECM	NA
EF218816	47	ECM	NA
EF372401	356	ericoid	EU
EF417823	427	ECM	NA
EF417824	325	ECM	NA
EF611157	334	ECM	EU
EF644145	480	ECM	EU
EF655694	50	ECM	EU
EU375709	49	ECM	NA
EU563494	327	ECM	CA
EU625925	108	cavendishioid	SA
EU625930	53	cavendishioid	SA
EU625931	396	cavendishioid	SA
EU625932	105	cavendishioid	SA
EU625933	51	ericoid	SA
EU625935	54	cavendishioid	SA
EU625939	52	cavendishioid	SA
EU625940	168	cavendishioid	SA
EU625946	171	cavendishioid	SA
EU625961	109	cavendishioid	SA
EU625962	97	ericoid	SA
EU625965	96	cavendishioid	SA
EU625968	99	cavendishioid	SA
EU625973	98	ericoid	SA
EU625985	169	cavendishioid	SA
EU625991	514	ericoid	AU
EU625995	515	orc	AU
EU625999	515	ericoid	AU
EU668220	356	orc	EU
EU668221	493	orc	EU
EU668222	501	orc	EU
EU668223	509	orc	EU
EU668224	268	orc	EU
EU668225	390	orc	EU
EU668259	508	orc	EU
EU668260	321	orc	EU
EU668261	55	orc	EU
EU668934	426	arbutoid	EU
EU819442	367	ECM	NA
EU826353	468	ECM	EU
EU909214	426	liverwort	EU
EU909215	58	liverwort	EU
EU909216	415	liverwort	EU
EU909219	416	liverwort	EU
EU909221	396	liverwort	EU
EU909223	397	liverwort	EU
EU909224	402	liverwort	EU
EU909225	197	liverwort	EU
EU910897	410	Endophytic	EU
EU910898	59	Endophytic	EU
EU910901	60	Endophytic	EU
EU910902	61	Endophytic	EU
EU910905	154	Endophytic	EU
EU910911	384	Endophytic	EU
EU910912	408	Endophytic	EU
EU910914	455	Endophytic	EU
EU910916	76	Endophytic	EU
EU910920	393	Endophytic	EU
EU910921	62	Endophytic	EU
EU910922	391	Endophytic	EU
EU910923	412	Endophytic	EU
EU910925	321	Endophytic	EU
EU910926	413	Endophytic	EU
EU910930	515	Endophytic	EU
EU910933	63	Endophytic	EU
FJ196959	504	ECM	CA
FJ196960	231	ECM	CA
FJ196961	220	ECM	CA
FJ196962	479	ECM	CA
FJ196963	64	ECM	CA
FJ196964	65	ECM	CA
FJ196965	455	ECM	CA
FJ196966	66	ECM	CA
FJ196967	67	ECM	CA
FJ196968	268	ECM	CA
FJ196969	68	ECM	CA
FJ196970	333	ECM	CA
FJ197211	440	ECM	NA
FJ210755	358	ECM	EU
FJ266735	267	ECM	NA
FJ378739	424	ECM	AS
FJ378740	330	ECM	AS
FJ378743	69	ECM	AS
FJ378744	271	ECM	AS
FJ378745	70	ECM	AS
FJ378747	349	ECM	AS
FJ403491	71	ECM	EU
FJ440936	157	arbutoid	NA
FJ440937	425	arbutoid	NA
FJ454897	72	Achlorophyllous	AS
FJ454903	73	Achlorophyllous	AS
FJ455011	74	Achlorophyllous	AS
FJ455033	75	Achlorophyllous	AS
FJ556812	410	orc	EU
FJ556815	480	Endophytic	EU
FJ556816	402	Endophytic	EU
FJ556835	77	Endophytic	EU
FJ556859	409	Endophytic	EU
FJ788787	78	orc	AF
FJ788811	196	orc	AF
FJ788822	79	orc	AF
FJ788823	80	orc	AF
FJ788824	81	orc	AF
FJ788825	82	orc	AF
FJ788827	153	orc	AF
FJ788830	83	orc	AF
FJ788831	417	orc	AF
FJ788832	84	orc	AF
FJ788835	85	orc	AF
FJ788836	86	orc	AF
FJ788839	87	orc	AF
FJ788843	88	orc	AF
FJ788845	89	orc	AF
FJ788853	385	orc	AF
FJ788854	90	orc	AF
FJ803936	322	ECM	AS
FJ803965	475	ECM	AS
FJ809768	456	orc	EU
FJ827241	91	ECM	AS
FJ857926	92	Achlorophyllous	AU
FM203298	144	orc	EU
FM995580	93	ECM	EU
FM997953	396	ECM	EU
FM997954	94	ericoid	EU
FN565341	396	ericoid	EU
FN663136	514	orc	AU
FN663653	100	cavendishioid	SA
FN663655	95	cavendishioid	SA
FN663657	169	cavendishioid	SA
FN663689	166	cavendishioid	SA
FN663732	100	cavendishioid	SA
FN663739	170	ericoid	CA
FN663740	101	cavendishioid	CA
FN663747	102	cavendishioid	CA
FN663760	103	cavendishioid	CA
FN663767	104	cavendishioid	CA
FN663793	111	cavendishioid	CA
FN663800	170	cavendishioid	CA
FN663801	167	ericoid	CA
FN663803	109	cavendishioid	CA
FN663804	106	ericoid	CA
FN663809	107	cavendishioid	CA
FN663810	166	cavendishioid	CA
FN663835	276	cavendishioid	CA
FN663839	110	ericoid	CA
FN663852	291	cavendishioid	NA
GQ221627	112	ericoid	NA
GQ221651	113	ECM	NA
GQ221654	114	ECM	NA
GQ223475	432	ECM	EU
GQ240918	412	orc	AS
GQ240919	115	ECM	AS
GQ268664	116	ECM	AS
GQ907068	124	ECM	EU
GQ907069	125	liverwort	EU
GQ907070	123	liverwort	EU
GQ907071	403	liverwort	EU
GQ907074	143	liverwort	EU
GQ907075	117	liverwort	EU
GQ907076	128	liverwort	EU
GQ907079	138	liverwort	EU
GQ907082	118	liverwort	EU
GQ907083	383	liverwort	EU
GQ907085	119	liverwort	EU
GQ907087	142	liverwort	EU
GQ907088	120	liverwort	EU
GQ907089	133	liverwort	EU
GQ907090	121	liverwort	EU
GQ907092	122	liverwort	EU
GQ907093	130	liverwort	EU
GQ907100	201	liverwort	EU
GQ907104	141	liverwort	EU
GQ907106	126	liverwort	EU
GQ907108	127	liverwort	EU
GQ907116	129	liverwort	EU
GQ907122	131	liverwort	EU
GQ907125	132	liverwort	EU
GQ907126	137	liverwort	EU
GQ907134	134	liverwort	EU
GQ907135	135	liverwort	AS
GQ907136	136	liverwort	SA
GQ907143	139	liverwort	EU
GQ907144	140	liverwort	EU
GQ985423	160	ECM	AS
GQ985425	145	ECM	AS
GU134517	146	ECM	AS
GU134523	147	ECM	AS
GU180319	270	ECM	NA
GU181889	148	ECM	EU
GU184061	425	ECM	NA
GU184065	149	ECM	NA
GU184067	150	ECM	NA
GU184069	151	ECM	NA
GU189681	152	Endophytic	EU
GU189685	155	Endophytic	EU
GU189696	199	Endophytic	EU
GU189711	416	Endophytic	EU
GU189718	153	Endophytic	EU
GU189729	397	Endophytic	EU
GU256181	156	Endophytic	EU
GU256182	429	ECM	EU
GU269910	329	ECM	AS
GU327499	355	ECM	EU
GU327500	158	orc	EU
HM044518	421	ECM	EU
HM105507	345	ECM	AS
HM105512	351	ECM	AS
HM105516	346	ECM	AS
HM105521	159	ECM	AS
HM105524	161	ECM	AS
HM105548	465	ECM	AS
HM136632	162	ECM	EU
HM136664	163	Endophytic	EU
HM146866	400	ECM	EU
HM230655	480	ECM	AS
HM230835	172	ericoid	SA
HM230837	171	ericoid	SA
HM230841	164	ericoid	SA
HM230843	165	ericoid	SA
HM359000	192	ericoid	EU
HM451792	180	ECM	SA
HM451798	181	orc	SA
HM451800	184	orc	SA
HM451802	182	orc	SA
HM451807	183	orc	SA
HM451809	173	orc	SA
HM451810	174	orc	SA
HM451814	175	orc	SA
HM451818	176	orc	SA
HM451820	177	orc	SA
HM451823	178	orc	SA
HM451825	179	orc	SA
HM852079	185	orc	SA
HQ154216	216	Endophytic	EU
HQ154220	522	ECM	EU
HQ154221	186	Endophytic	EU
HQ154222	516	Endophytic	EU
HQ154223	187	Endophytic	EU
HQ154225	392	Endophytic	EU
HQ154227	189	Endophytic	EU
HQ154228	513	Endophytic	EU
HQ154230	206	Endophytic	EU
HQ154232	188	ECM	EU
HQ154233	472	Endophytic	EU
HQ154234	474	Endophytic	EU
HQ154240	200	Endophytic	EU
HQ154242	189	Endophytic	EU
HQ154251	366	Endophytic	EU
HQ154253	191	Endophytic	EU
HQ154261	190	Endophytic	EU
HQ154274	214	ECM	EU
HQ154276	430	ECM	EU
HQ154277	192	Endophytic	EU
HQ154278	193	Endophytic	EU
HQ154279	503	Endophytic	EU
HQ154282	208	Endophytic	EU
HQ154283	478	Endophytic	EU
HQ154285	194	Endophytic	EU
HQ154286	470	Endophytic	EU
HQ154287	396	Endophytic	EU
HQ154288	285	ECM	EU
HQ154289	284	ECM	EU
HQ154295	213	Endophytic	EU
HQ154296	291	Endophytic	EU
HQ154301	215	Endophytic	EU
HQ154302	196	Endophytic	EU
HQ154303	286	Endophytic	EU
HQ154304	195	Endophytic	EU
HQ154306	197	Endophytic	EU
HQ154307	414	Endophytic	EU
HQ154308	492	Endophytic	EU
HQ154309	522	Endophytic	EU
HQ154310	508	ECM	EU
HQ154312	473	ECM	EU
HQ154314	356	ECM	EU
HQ154315	506	Endophytic	EU
HQ154316	275	Endophytic	EU
HQ154317	456	Endophytic	EU
HQ154320	198	Endophytic	EU
HQ154321	199	ECM	EU
HQ154328	419	Endophytic	EU
HQ154331	349	Endophytic	EU
HQ154341	218	Endophytic	EU
HQ154343	201	Endophytic	EU
HQ154344	501	Endophytic	EU
HQ154350	433	Endophytic	EU
HQ154351	431	Endophytic	EU
HQ154352	202	Endophytic	EU
HQ154355	203	Endophytic	EU
HQ154359	204	Endophytic	EU
HQ154362	212	Endophytic	EU
HQ154366	281	Endophytic	EU
HQ154370	389	Endophytic	EU
HQ154371	205	Endophytic	EU
HQ154374	207	Endophytic	EU
HQ154375	433	ECM	EU
HQ154376	223	ECM	EU
HQ154387	209	Endophytic	EU
HQ154391	210	Endophytic	EU
HQ154392	276	Endophytic	EU
HQ154395	211	Endophytic	EU
HQ154402	432	Endophytic	EU
HQ154408	215	Endophytic	EU
HQ154410	216	ECM	EU
HQ154418	217	Endophytic	EU
HQ154419	281	ericoid	EU
HQ154420	277	ericoid	EU
HQ204720	474	Endophytic	EU
HQ204721	219	ECM	EU
HQ204722	513	ECM	EU
HQ271374	221	ECM	CA
HQ271375	222	ECM	CA
HQ271377	224	ECM	CA
HQ271378	225	ECM	CA
HQ330994	474	ECM	NA
HQ667814	325	orc	CA
HQ667816	355	Achlorophyllous	CA
HQ667818	227	Achlorophyllous	CA
HQ667819	332	Achlorophyllous	CA
HQ667842	228	Achlorophyllous	NA
HQ667860	229	Achlorophyllous	NA
HQ667869	333	Achlorophyllous	NA
HQ667871	324	Achlorophyllous	NA
HQ667874	230	Achlorophyllous	NA
HQ667881	455	Achlorophyllous	NA
HQ667895	522	Achlorophyllous	NA
HQ667916	480	Achlorophyllous	NA
HQ696070	290	Achlorophyllous	AS
HQ853681	232	Endophytic	AS
HQ853682	233	orc	AS
HQ853683	234	orc	AS
JF273541	235	orc	AS
JF506803	236	ECM	EU
JF506804	237	ECM	EU
JF506806	238	ECM	EU
JF506807	239	ECM	EU
JF506809	240	ECM	EU
JF506810	241	ECM	EU
JF506811	461	ECM	EU
JF506812	495	ECM	EU
JF519013	516	ECM	EU
JF690992	248	ECM	AF
JF691010	250	orc	AF
JF691028	242	orc	AF
JF691073	253	orc	AF
JF691108	243	orc	AF
JF691116	244	orc	AF
JF691133	245	orc	AF
JF691149	246	orc	AF
JF691166	247	orc	AF
JF691172	265	orc	AF
JF691222	249	orc	AF
JF691443	251	orc	AF
JF691462	252	orc	AF
JF748113	254	ECM	AS
JF906112	255	ECM	AS
JF912454	256	orc	EU
JF960766	490	orc	AU
JF960826	450	ECM	AU
JF960827	449	ECM	AU
JF960828	257	ECM	AU
JN168754	258	ECM	SA
JN168755	259	ECM	SA
JN168756	261	ECM	SA
JN168757	260	ECM	SA
JN392098	416	ECM	EU
JN704835	262	ECM	CA
JN887995	360	ECM	CA
JN887997	264	ECM	CA
JQ012947	373	ECM	CA
JQ063056	387	ECM	SA
JQ063057	388	ECM	SA
JQ272332	519	ECM	NA
JQ272410	520	ericoid	NA
JQ272430	265	ericoid	NA
JQ318607	266	ECM	AS
JQ347196	269	ECM	AS
JQ347197	523	ECM	AS
JQ347201	272	ECM	AS
JQ347205	273	ECM	AS
JQ393116	324	ECM	NA
JQ393117	508	arbutoid	NA
JQ393118	274	arbutoid	NA
JQ393119	361	arbutoid	NA
JQ393121	506	arbutoid	NA
JQ420941	275	ECM	EU
JQ420943	278	ericoid	EU
JQ420954	284	ericoid	EU
JQ420956	286	ericoid	EU
JQ420957	285	ericoid	EU
JQ420961	279	ericoid	EU
JQ420988	280	Endophytic	EU
JQ420992	281	Endophytic	EU
JQ420993	282	Endophytic	EU
JQ420994	285	Endophytic	EU
JQ420997	283	Endophytic	EU
JQ616803	288	ECM	NA
JQ665465	352	ECM	EU
JQ665511	510	ECM	EU
JQ665513	289	ECM	EU
JQ665515	354	ECM	EU
JQ665516	494	ECM	EU
JQ665542	432	ECM	EU
JQ794486	290	ECM	AS
JQ991833	292	ECM	AS
JQ991835	293	ECM	AS
JQ991836	294	ECM	AS
JQ991837	295	ECM	AS
JQ991900	296	ECM	AS
JQ994457	342	ECM	NA
JQ994461	297	orc	NA
JQ994469	340	orc	NA
JX030285	419	orc	NA
JX138544	303	ECM	AU
JX138547	298	orc	AU
JX138548	299	orc	AU
JX138549	300	orc	AU
JX138551	301	orc	AU
JX138552	302	orc	AU
JX138555	304	orc	AU
JX138556	305	orc	AU
JX316811	428	orc	NA
JX317084	306	ECM	SA
JX317141	314	orc	SA
JX317143	307	orc	SA
JX317168	313	orc	SA
JX317169	308	orc	SA
JX317213	445	orc	SA
JX317218	320	orc	SA
JX317219	309	orc	SA
JX317221	310	orc	SA
JX317295	311	orc	SA
JX317303	312	orc	SA
JX317317	316	orc	SA
JX317333	315	orc	SA
JX317440	317	orc	SA
JX317453	318	orc	SA
JX317488	319	orc	SA
JX561233	440	arbutoid	EU
JX625315	382	ECM	EU
JX625322	503	ECM	EU
JX625328	353	ECM	EU
JX625329	497	ECM	EU
JX630488	328	ECM	NA
JX630493	507	ECM	NA
JX630554	350	ECM	NA
JX630661	331	ECM	NA
JX630699	332	ECM	NA
JX630709	506	ECM	NA
JX630725	502	ECM	NA
JX998828	335	orc	CA
JX998829	336	orc	CA
JX998831	337	orc	CA
JX998832	338	orc	CA
JX998835	339	orc	CA
KC019910	341	Endophytic	EU
KC019921	341	ericoid	EU
KC876350	525	ECM	NA
KC928372	348	orc	SA
KF000449	431	ECM	EU
KF000502	359	ECM	EU
KF000591	464	ECM	EU
KF000675	357	ECM	EU
KF061263	366	saprobic	EU
KF061278	363	ECM	NA
KF061280	457	ECM	CA
KF061285	410	ECM	EU
KF061289	364	orc	EU
KF061292	514	Endophytic	EU
KF359621	368	ECM	NA
KF359622	519	ECM	NA
KF385265	369	Endophytic	AS
KF385266	370	Endophytic	AS
KF386022	371	orc	EU
KF419113	372	ECM	CA
KF484424	477	ECM	EU
KF574233	374	orc	AS
KF574234	375	orc	AS
KF574235	376	orc	AS
KF574236	377	orc	AS
KF574237	378	orc	AS
KF574238	379	orc	AS
KF574239	380	orc	AS
KF574240	381	orc	AS
KF718255	385	Endophytic	AS
KF718257	386	Endophytic	AS
KF871205	473	orc	EU
KJ188464	438	Achlorophyllous	EU
KJ188465	410	Achlorophyllous	EU
KJ188466	405	Achlorophyllous	EU
KJ188471	393	Achlorophyllous	EU
KJ188473	406	Achlorophyllous	EU
KJ188476	391	Achlorophyllous	EU
KJ188479	392	Achlorophyllous	EU
KJ188482	402	Achlorophyllous	EU
KJ188483	394	Achlorophyllous	EU
KJ188485	395	Achlorophyllous	EU
KJ188486	396	Achlorophyllous	EU
KJ188494	399	Achlorophyllous	EU
KJ188499	408	Achlorophyllous	EU
KJ188507	400	Achlorophyllous	EU
KJ188510	401	Achlorophyllous	EU
KJ188512	416	Achlorophyllous	EU
KJ188515	403	Achlorophyllous	EU
KJ188517	404	Achlorophyllous	EU
KJ188527	409	Achlorophyllous	EU
KJ188532	407	Achlorophyllous	EU
KJ188548	411	Achlorophyllous	EU
KJ482673	415	Endophytic	EU
KJ482675	417	Endophytic	EU
KJ482676	418	Endophytic	EU
KJ701307	420	ECM	SA
KJ769303	422	ECM	EU
KM277619	423	orc	AS
KM576576	459	ECM	EU
KM576596	437	ECM	EU
KM576599	471	ECM	EU
KM588810	526	ECM	AS
KM588811	527	ECM	AS
KM588812	528	ECM	AS
KP142112	438	orc	EU
KP142114	439	orc	EU
KP866133	441	ECM	AS
KP896286	442	ECM	CA
KR019821	443	ECM	EU
KT339265	444	ECM	SA
UDB002605	462	ECM	EU
UDB002742	447	ECM	AU
UDB002743	448	ECM	AU
UDB004747	486	ECM	AF
UDB004797	451	ECM	AF
UDB004856	452	ECM	AS
UDB004857	453	ECM	AS
UDB004859	454	ECM	AS
UDB005034	458	ECM	EU
UDB005245	460	ECM	EU
UDB005330	463	ECM	AS
UDB005444	467	ECM	AS
UDB005565	469	ECM	AS
UDB007179	476	ECM	SA
UDB008167	481	ECM	AF
UDB008168	482	ECM	AF
UDB008169	483	ECM	AF
UDB008170	484	ECM	AF
UDB008171	485	ECM	AF
UDB008172	489	ECM	AF
UDB008174	487	ECM	AF
UDB008175	488	ECM	AF
UDB013733	496	ECM	EU
UDB013749	498	ECM	AS
UDB014488	500	ECM	AS
UDB014604	505	ECM	EU
UDB017484	512	ECM	AS
